# Supplementary material for: Quantitative Prediction of the Landscape of T Cell Epitope Immunogenicity in Sequence Space
Source: Front Immunol. 2019 Apr 16;10:827. doi: 10.3389/fimmu.2019.00827 (PMC6477061; doi:10.3389/fimmu.2019.00827)
Supplement: Supplementary file 7 [file Data_Sheet_6.csv]

AAIndexID	Description	PMID	Author	Title	Reference	AA	RA	RR	NA	NR	NN	DA	DR	DN	DD	CA	CR	CN	CD	CC	QA	QR	QN	QD	QC	QQ	EA	ER	EN	ED	EC	EQ	EE	GA	GR	GN	GD	GC	GQ	GE	GG	HA	HR	HN	HD	HC	HQ	HE	HG
BASU010101	Optimization-based potential derived by the modified perceptron criterion	PMID:11391771	Bastolla, U., Farwer, J., Knapp, E.W. and Vendruscolo, M.	How to guarantee optimal stability for most representative structures in the protein data bank	Proteins 44, 79-96 (2001)	-0.0479	0.1049	0.0306	0.1049	-0.015	-0.0917	0.1018	-0.1859	0.0192	0.084	-0.1085	0.0544	-0.0844	0.1169	-1.0442	-0.0457	0.0059	-0.005	-0.0728	0.0715	-0.055	0.1346	-0.3511	0.1146	0.1581	0.155	-0.0413	0.1259	0.1844	-0.0251	0.1196	0.1115	-0.0982	0.171	0.2311	0.2219	0.0266	-0.0184	0.0386	-0.0749	-0.0701	-0.0125	-0.0827	0.0979
BETM990101	Modified version of the Miyazawa-Jernigan transfer energy	PMID:10048329	Betancourt,M.R. and Thirumalai,D.	Pair potentials for protein folding: Choice of reference states and sensitivity of predicted native states to variations in the interaction schemes	Protein Science 8, 361-369 (1999)	-0.2	0.27	0.13	0.24	0.02	-0.04	0.3	-0.71	-0.12	0.27	-0.26	0.32	0.28	0.38	-1.34	0.21	-0.12	-0.05	0.12	0.04	0.14	0.43	-0.75	-0.01	0.4	0.46	0.1	0.45	-0.03	0.14	0.1	0.17	-0.09	0.2	0.48	-0.2	0.21	0.04	0.1	-0.22	-0.19	0.22	-0.11	0.23
BONM030101	Quasichemical statistical potential for the antiparallel orientation of interacting side groups	PMID:15072433	Boniecki, M., Rotkiewicz, P., Skolnick, J. and Kolinski, A.	Protein fragment reconstruction using various modeling techniques	J. Comput. Aided Mol. Des. 17, 725-738 (2003)	-0.1	0.6	0.4	0.7	0.1	0.6	1	-0.2	0.8	1.8	-0.3	-0.7	0.2	0.6	-2.3	0.6	0.2	0.8	1.2	0.1	0.8	1	-0.1	1.2	2.1	0.7	1.6	2.3	0.1	0.7	0.3	0.5	-0.4	0.6	1	0.1	0.4	0	-0.2	-0.3	-1.2	-0.1	0	0.5
BONM030102	Quasichemical statistical potential for the intermediate orientation of interacting side groups	PMID:15072433	Boniecki, M., Rotkiewicz, P., Skolnick, J. and Kolinski, A.	Protein fragment reconstruction using various modeling techniques	J. Comput. Aided Mol. Des. 17, 725-738 (2003)	0.1	0.5	-0.2	0.4	-0.3	0.1	0.6	-0.8	0.2	0.6	-0.2	-0.6	0.3	0.3	-1.7	0.4	-0.4	0.3	0.6	0.3	0.6	0.8	-0.7	0.6	1.1	0.8	0.7	1.2	0.4	0.4	0.2	0.5	-0.3	0.5	0.9	0.1	0.5	-0.4	-0.5	-0.6	-1.1	-0.2	-0.4	0.4
BONM030103	Quasichemical statistical potential for the parallel orientation of interacting side groups	PMID:15072433	Boniecki, M., Rotkiewicz, P., Skolnick, J. and Kolinski, A.	Protein fragment reconstruction using various modeling techniques	J. Comput. Aided Mol. Des. 17, 725-738 (2003)	-0.1	0.3	-0.8	0.1	-0.8	-0.6	0.1	-1.2	-0.6	-0.2	-0.5	-0.6	-0.1	0.2	-1.6	0.2	-1	-0.3	-0.3	0	-0.3	0.4	-1.4	-0.2	0.1	0.6	-0.2	0.2	0.3	0.3	0.1	0.2	-0.2	0.2	0.4	0.1	0	-0.9	-0.8	-1	-1.3	-0.9	-1	0.3
BRYS930101	Distance-dependent statistical potential (only energies of contacts within 0-5 Angstrooms are included)	PMID:8497488	Bryant, S.H. and Lawrence, C.E.	An Empirical Energy Function for Threading Protein-Sequence Through the Folding Motif	Proteins 16, 92-112 (1993)	0.23	0.237	-0.145	0.159	-0.303	-0.206	0.14	-0.527	-0.534	0.539	0.159	0.174	0.105	-0.137	-0.524	-0.008	0.222	-0.187	-0.128	0.487	-0.43	0.182	-0.717	-0.262	-0.178	0.121	-0.728	1.06	0.282	-0.037	-0.097	-0.336	-0.187	-0.072	-0.041	-0.068	-0.079	0.111	-0.141	-0.27	-0.187	0.247	0.072	0.127
KESO980101	Quasichemical transfer energy derived from interfacial regions of protein-protein complexes	PMID:9865952	Keskin, O., Bahar, I., Badretdinov, A.Y., Ptitsyn, O.B. and Jernigan, R.L.	Empirical solvent-mediated potentials hold for both intra-molecular and inter-molecular inter-residue interactions	Protein Science 7, 2578-2586 (1998)	-3.51	-3.26	-3.98	-2.06	-2.67	-1.99	-2.74	-3.92	-2.5	-2.47	-3.99	-4.41	-1.76	-3.56	-7.23	-3.65	-4.13	-3	-3.15	-4.37	-4.71	-2.69	-4.05	-2.43	-2.35	-3.02	-3.45	-2.85	-2.24	-2.71	-1.63	-1.84	-3.43	-3.02	-1.58	-1.77	-3.29	-3.24	-3.05	-2.93	-4.79	-4.2	-3.15	-2.47
KESO980102	Quasichemical energy in an average protein environment derived from interfacial regions of protein-protein complexes	PMID:9865952	Keskin, O., Bahar, I., Badretdinov, A.Y., Ptitsyn, O.B. and Jernigan, R.L.	Empirical solvent-mediated potentials hold for both intra-molecular and inter-molecular inter-residue interactions	Protein Science 7, 2578-2586 (1998)	-0.38	0.16	-0.26	0.31	-0.02	-0.4	0.02	-0.87	-0.51	-0.07	0	-0.12	1.46	0.06	-2.38	0.08	-0.11	-0.05	0.21	0.21	-0.38	0.2	-0.87	-0.3	0.17	0.72	0.03	-0.2	0.08	-0.1	-0.09	0.11	-0.26	-0.11	0.5	-0.27	0.01	0.35	-0.52	0	-0.64	-0.31	-0.1	0.01
KOLA930101	Statistical potential derived by the quasichemical approximation	No reference	Kolinski, A., Godzik, A. and Skolnick, J.	A general method for the prediction of the three dimensional structure and folding pathway of globular proteins: Application to designed helical proteins	J. Chem. Phys. 98, 7420-7433 (1993)	-0.1	0.5	0.2	0.1	0	-0.4	0.1	-1.1	-0.6	0.3	0.1	0.4	0.3	0.3	-3.3	0	-0.5	-0.4	0	0.1	0	0.5	-0.9	-0.4	0.3	0.8	0.2	0.6	0.1	0.5	-0.1	-0.4	0.1	-0.1	0.6	0.3	-0.1	-0.4	-0.5	-1	-1.2	0.9	-0.9	0.3
LIWA970101	Modified version of the Miyazawa-Jernigan transfer energy	No reference	Liwo, A., Oldziej, S., Pincus, M.R., Wawak, R.J., Rackovsky, S. and Scheraga, H.A.	A united-residue force field for off-lattice protein-structure simulations: 1. Functional forms and parameters of long-range side-chain interaction potentials from protein crystal data.	J. Comp. Chem. 18, 849-873 (1997)	-3.28	-2.56	-2.03	-2.59	-2.19	-2.24	-2.52	-2.67	-2.21	-1.85	-3.93	-3.02	-3.14	-3.12	-4.54	-2.67	-2.25	-2.26	-2.09	-3.31	-1.94	-2.45	-2.61	-2.14	-1.77	-2.97	-1.93	-1.6	-2.91	-2.43	-2.41	-2.34	-3.68	-2.39	-2.12	-2.62	-2.95	-2.6	-2.6	-2.7	-3.87	-2.48	-2.49	-2.77
MICC010101	Optimization-derived potential	PMID:11151013	Micheletti, C., Seno, F., Banavar, J.R. and Maritan, A.	Learning effective amino acid interactions through iterative stochastic techniques	Proteins 42, 422-431 (2001)	0.001461	-0.002511	0.009875	0.003323	-0.006728	-0.001962	-0.001348	0.001974	0.007855	-0.000531	-0.000751	-0.006062	0.006139	0.002278	-0.002544	0.005029	-0.00121	0.004502	-0.001466	0.001387	0.008438	-0.002376	-0.004586	-0.003154	0.002194	0.002791	-0.005234	0.006456	-0.003111	0.002466	-0.001649	0.001528	0.001847	-0.000425	-0.000113	0.00099	-0.002432	0.009985	0.008099	-0.002501	0.054553	0.005803	-0.007232	-0.000951
MIRL960101	Statistical potential derived by the maximization of the harmonic mean of Z scores	PMID:9000638	Mirny, L.A. and Shakhnovich, E.I.	How to derive a protein folding potential? A new approach to an old problem	J. Mol. Biol. 264, 1164-1179 (1996)	-0.13	0.43	0.11	0.28	-0.14	-0.53	0.12	-0.72	-0.3	0.04	0	0.24	0.13	0.03	-1.06	0.08	-0.52	-0.25	-0.17	0.05	0.29	0.26	-0.74	-0.32	-0.15	0.69	-0.17	-0.03	-0.07	-0.04	-0.14	-0.22	-0.08	-0.06	0.25	-0.38	0.34	-0.12	-0.24	-0.39	-0.19	-0.02	-0.45	0.2
MIYS850102	Quasichemical energy of transfer of amino acids from water to the protein environment	No reference	Miyazawa, S. and Jernigan, R.L.	Estimation of Effective Interresidue Contact Energies from Protein Crystal-Structures-Quasi-Chemical Approximation	Macromolecules 18, 534-552 (1985)	-2.51	-1.5	-1.39	-1.44	-1.41	-1.59	-1.57	-1.98	-1.33	-0.96	-3.38	-2.7	-2.59	-2.66	-5.44	-1.7	-1.85	-1.36	-1.26	-2.73	-0.89	-1.51	-2.07	-1.43	-1.23	-2.08	-1.33	-1.18	-2.15	-1.68	-1.56	-1.62	-3.16	-1.54	-1.22	-2.17	-2.09	-2.12	-2.01	-2.14	-3.63	-1.85	-2.27	-1.94
MIYS850103	Quasichemical energy of interactions in an average buried environment	No reference	Miyazawa, S. and Jernigan, R.L.	Estimation of Effective Interresidue Contact Energies from Protein Crystal-Structures-Quasi-Chemical Approximation	Macromolecules 18, 534-552 (1985)	-0.13	0.44	0.11	0.28	-0.13	-0.53	0.12	-0.73	-0.3	0.04	0	0.24	0.13	0.03	-1.06	0.07	-0.52	-0.25	-0.18	0.04	0.27	0.25	-0.75	-0.33	-0.16	0.68	-0.18	-0.04	-0.07	-0.04	-0.14	-0.23	-0.08	-0.07	0.24	-0.39	0.34	-0.13	-0.24	-0.4	-0.2	-0.03	-0.46	0.19
MIYS960101	Quasichemical energy of transfer of amino acids from water to the protein environment	PMID:8604144	Miyazawa, S. and Jernigan, R.L.	Residue-residue potentials with a favorable contact pair term and an unfavorable high packing density term, for simulation and threading	J. Mol. Biol. 256, 623-644 (1996)	-2.72	-1.83	-1.55	-1.84	-1.64	-1.68	-1.7	-2.29	-1.68	-1.21	-3.57	-2.57	-2.59	-2.41	-5.44	-1.89	-1.8	-1.71	-1.46	-2.85	-1.54	-1.51	-2.27	-1.51	-1.02	-2.27	-1.42	-0.91	-2.31	-1.72	-1.74	-1.59	-3.16	-1.66	-1.22	-2.24	-2.41	-2.16	-2.08	-2.32	-3.6	-1.98	-2.15	-2.15
MIYS960102	Quasichemical energy of interactions in an average buried environment	PMID:8604144	Miyazawa, S. and Jernigan, R.L.	Residue-residue potentials with a favorable contact pair term and an unfavorable high packing density term, for simulation and threading	J. Mol. Biol. 256, 623-644 (1996)	-0.13	0.3	0.12	0.1	-0.16	-0.39	0.16	-0.89	-0.47	-0.08	0.02	0.56	0.35	0.45	-0.85	0.13	-0.24	-0.34	-0.17	0.17	-0.09	0.3	-0.92	-0.35	0.06	0.54	-0.18	0.12	-0.1	0.03	-0.18	-0.11	0.05	-0.02	0.21	-0.41	0.17	-0.04	-0.15	-0.47	-0.02	0.03	-0.35	0.05
MIYS990106	Quasichemical energy of transfer of amino acids from water to the protein environment	PMID:10336383	Miyazawa, S. and Jernigan, R.L.	Self-consistent estimation of inter-residue protein contact energies based on an equilibrium mixture approximation of residues	Proteins 34, 49-68 (1999)	-0.12	0.24	0.19	0.15	0.1	-0.06	0.27	-0.24	0.02	0.29	-0.33	0.08	-0.01	0.12	-1.19	0.22	0.09	0.06	0.24	-0.07	0.2	0.38	-0.22	0.12	0.44	0.2	0.27	0.46	-0.08	0.09	-0.01	0.11	-0.31	0.13	0.32	-0.29	0.07	0.05	0	-0.1	-0.36	0.15	0	0
MIYS990107	Quasichemical energy of interactions in an average buried environment	PMID:10336383	Miyazawa, S. and Jernigan, R.L.	Self-consistent estimation of inter-residue protein contact energies based on an equilibrium mixture approximation of residues	Proteins 34, 49-68 (1999)	-0.08	0.18	0.03	0.07	-0.08	-0.26	0.1	-0.51	-0.27	-0.09	0.01	0.32	0.21	0.25	-0.55	0.09	-0.14	-0.19	-0.1	0.1	-0.1	0.19	-0.51	-0.19	0.04	0.31	-0.09	0.04	-0.04	0.03	-0.09	-0.06	0.03	0	0.13	-0.25	0.11	-0.01	-0.08	-0.27	-0.02	0.02	-0.19	0.04
MOOG990101	Quasichemical potential derived from interfacial regions of protein-protein complexes	PMID:10328272	Moont, G., Gabb, H.A. and Sternberg, M.J.E.	Use of pair potentials across protein interfaces in screening predicted docked complexes	Proteins 35, 364-373 (1999)	-0.48	-0.2	-0.11	-0.21	0.24	-0.18	-0.39	0.45	-0.12	-0.65	-0.12	0.17	-0.3	-0.49	0	-0.16	0.24	0.08	-0.01	0.23	-0.29	-0.39	0.37	-0.01	-0.35	-0.14	-0.05	-0.67	-0.29	0.01	-0.18	-0.24	0.11	0.05	-0.37	-0.39	0.04	0.1	-0.14	0.06	0	0.01	0.14	0.08
SIMK990101	Distance-dependent statistical potential (contacts within 0-5 Angstrooms)	PMID:10336385	Simons, K.T., Ruczinski, I., Kooperberg, C., Fox, B.A., Bystroff, C. and Baker, D.	Improved recognition of native-like protein structures using a combination of sequence-dependent and sequence-independent features of proteins	Proteins 34, 82-95 (1999)	-0.13571	0.37121	0.23245	0.25935	-0.2705	-0.61455	0.33397	-0.78243	-0.4183	0.06704	0.23079	0.49103	0.32481	0.53024	-1.79243	0.26575	-0.25307	-0.26143	-0.00061	0.252	-0.24068	0.26471	-0.78607	-0.1801	0.24572	0.6636	-0.05835	0.51101	-0.01467	-0.08319	-0.37069	-0.22435	0.20423	-0.0189	0.14922	-0.48115	0.32413	-0.10894	-0.0042	-0.47402	0.24383	-0.03046	-0.10674	0.08603
SIMK990102	Distance-dependent statistical potential (contacts within 5-7.5 Angstrooms)	PMID:11782533	Simons, K.T., Ruczinski, I., Kooperberg, C., Fox, B.A., Bystroff, C. and Baker, D.	Improved recognition of native-like protein structures using a combination of sequence-dependent and sequence-independent features of proteins	Proteins 34, 82-95 (1999)	-0.02226	0.09517	0.07551	0.02956	-0.20477	-0.4372	0.13313	-0.75762	-0.36779	-0.21301	-0.04411	0.21192	0.05061	0.16627	-0.35421	0.08891	-0.10846	-0.29003	-0.22107	0.0607	-0.25399	0.1522	-0.73107	-0.2905	-0.05421	0.46641	-0.22637	-0.06802	-0.05662	-0.11493	-0.20722	-0.13454	-0.15618	-0.16506	-0.01456	-0.14051	0.02143	0.02841	-0.22095	-0.51082	-0.08947	-0.13022	-0.38576	-0.17065
SIMK990103	Distance-dependent statistical potential (contacts within 7.5-10 Angstrooms)	PMID:11782533	Simons, K.T., Ruczinski, I., Kooperberg, C., Fox, B.A., Bystroff, C. and Baker, D.	Improved recognition of native-like protein structures using a combination of sequence-dependent and sequence-independent features of proteins	Proteins 34, 82-95 (1999)	-0.06711	0.06154	-0.08474	0.09263	-0.15773	-0.17967	0.08686	-0.30946	-0.15017	-0.1721	0.04917	0.10341	0.02032	0.08274	-0.1711	0.07189	-0.13486	-0.11794	-0.12196	0.02698	-0.09693	0.1011	-0.28982	-0.09284	-0.14442	0.12837	-0.10631	-0.17005	0.02605	-0.05025	-0.02792	-0.01798	-0.06868	-0.02051	0.04571	-0.08089	0.06456	-0.02235	-0.07118	-0.12234	-0.05122	-0.07235	-0.08473	-0.00788
SIMK990104	Distance-dependent statistical potential (contacts within 10-12 Angstrooms)	PMID:11782533	Simons, K.T., Ruczinski, I., Kooperberg, C., Fox, B.A., Bystroff, C. and Baker, D.	Improved recognition of native-like protein structures using a combination of sequence-dependent and sequence-independent features of proteins	Proteins 34, 82-95 (1999)	-0.01427	0.00319	-0.07401	0.03854	-0.05011	-0.03011	0.03348	-0.04608	-0.01565	-0.01488	0.01382	-0.02161	0.00085	0.05671	-0.03752	0.02023	-0.02214	-0.02505	-0.00434	0.02667	-0.06601	0.02897	-0.05432	-0.01793	-0.00697	0.03232	-0.02655	-0.08009	0.03371	0.00933	-0.00528	-0.021	-0.02424	-0.02658	0.0338	-0.02023	0.01652	0.02289	-0.02616	0.01351	-0.06586	-0.00106	0.01615	-0.08543
SIMK990105	Distance-dependent statistical potential (contacts longer than 12 Angstrooms)	PMID:11782533	Simons, K.T., Ruczinski, I., Kooperberg, C., Fox, B.A., Bystroff, C. and Baker, D.	Improved recognition of native-like protein structures using a combination of sequence-dependent and sequence-independent features of proteins	Proteins 34, 82-95 (1999)	-0.00347	0.00335	-0.00407	0.00391	-0.00739	-0.01002	0.00414	-0.016	-0.00825	-0.00786	0.0018	0.01195	0.00797	0.01489	-0.10838	0.00343	-0.00609	-0.00689	-0.00644	0.00991	-0.00745	0.00406	-0.01522	-0.00681	-0.00727	0.01832	-0.00728	-0.00947	0.00106	-0.00194	-0.0034	-0.00242	-0.00362	-0.00242	0.00092	-0.00526	0.00321	0.00007	-0.00362	-0.00685	-0.00424	-0.00218	-0.00352	-0.00394
SKOJ000101	Statistical quasichemical potential with the partially composition-corrected pair scale	PMID:10651034	Skolnick, J., Kolinski, A. and Ortiz, A.	Derivation of protein-specific pair potentials based on weak sequence fragment similarity	Proteins 38, 3-16 (2000)	1	0.4	-0.1	0.8	0	0.1	1.1	-0.6	0	0.6	0.6	0.2	0.5	0.5	-1.7	0.6	0	0	0.2	0.2	0	1.1	-0.5	0.3	0.7	0.8	0.2	1	1.4	0.3	0.6	0.8	0.9	0.8	1.1	1.7	0.5	-0.1	0	-0.2	-0.2	-0.1	-0.1	0.7
SKOJ000102	Statistical quasichemical potential with the composition-corrected pair scale	PMID:10651034	Skolnick, J., Kolinski, A. and Ortiz, A.	Derivation of protein-specific pair potentials based on weak sequence fragment similarity	Proteins 38, 3-16 (2000)	0.8	0.3	-0.3	0.7	-0.2	-0.2	0.9	-0.6	0	0.2	0	-0.6	-0.5	-0.3	-2.4	0.4	-0.2	-0.2	0	-0.7	-0.5	1	-0.5	0.2	0.5	-0.2	0.1	0.5	1.2	0.2	0.4	0.7	0.1	0.5	0.9	1.1	0.2	-0.4	-0.4	-0.4	-1.4	-0.5	-0.3	0.3
SKOJ970101	Statistical potential derived by the quasichemical approximation	PMID:9070450	Skolnick, J., Jaroszewski, L., Kolinski, A. and Godzik, A.	Derivation and testing of pair potentials for protein folding. When is the quasichemical approximation correct?	Protein Science 6, 676-688 (1997)	0.8	0.6	-0.1	0.9	0	0.1	1.2	-0.5	0.4	0.9	0.6	0.7	0.6	0.8	-1.3	0.6	0.2	0.2	0.6	0.3	0.3	1.2	-0.4	0.5	0.9	0.9	0.8	1.2	1.2	0.2	0.7	0.8	1.3	0.8	1.1	1.5	0.4	-0.1	0.2	-0.1	0.1	0.1	0.1	0.7
TANS760101	Statistical contact potential derived from 25 x-ray protein structures	PMID:1004017	Tanaka, S. and Scheraga, H.A.	Medium- and long-range interaction parameters between amino acids for predicting three-dimensional structures of proteins	Macromolecules 9, 945-950 (1976)	-2.6	-3.4	-4.3	-3.1	-4.1	-3.2	-2.8	-3.9	-3.1	-2.7	-4.2	-5.3	-4.9	-4.2	-7.1	-3.5	-4.5	-3.8	-3.2	-5	-3.4	-3	-4.2	-3.4	-3.3	-4.4	-3.6	-2.8	-3.8	-4.5	-4	-3.7	-5.4	-4.4	-3.8	-3.9	-4	-4.9	-4.4	-4.3	-5.6	-4.7	-4.5	-4.7
THOP960101	Mixed quasichemical and optimization-based protein contact potential	PMID:8876187	Thomas, P.D. and Dill, K.A.	An iterative method for extracting energy-like quantities from protein structures	Proc. Natl. Acad. Sci. USA 93, 11628-11633 (1996)	-0.08	0.07	0.23	-0.14	0.04	-0.86	0.1	-0.15	-0.12	0.6	-0.3	-0.4	-0.32	0.55	-1.79	-0.11	0.62	-0.05	0.46	-0.49	-0.08	0.03	-0.26	-0.25	0.68	0.04	0.62	0.21	-0.09	-0.15	-0.18	-0.06	-0.42	0.12	0.4	0.04	-0.15	-0.01	0.06	-0.06	-0.82	0.05	-0.53	0
TOBD000101	Optimization-derived potential obtained for small set of decoys	PMID:10813832	Tobi, D., Shafran, G., Linial, N. and Elber, R.	On the design and analysis of protein folding potentials	Proteins 40, 71-85 (2000)	-0.17	0.03	1.01	0.33	0.82	-0.68	0.58	-0.4	0.28	-0.24	-0.48	0.8	-1.89	-0.32	-2.94	-0.14	0.5	0.87	-0.26	-0.84	0.73	0.29	-0.91	0.78	0.18	0.16	0.48	1.03	0.43	0.12	0.46	-0.55	0.14	-0.08	0.88	-0.3	0.66	-0.62	0.95	0.63	-2.34	0.83	-0.17	0.19
TOBD000102	Optimization-derived potential obtained for large set of decoys	PMID:10813832	Tobi, D., Shafran, G., Linial, N. and Elber, R.	On the design and analysis of protein folding potentials	Proteins 40, 71-85 (2000)	-0.15	-0.16	0.65	1.01	0.14	-0.45	0.62	-0.57	-0.53	0.89	-0.96	-0.25	0.18	-0.5	-2.11	0.16	1.24	0.57	0.78	-0.54	0.41	-0.02	-0.7	-0.19	0.83	0.65	0.28	1.59	0.23	0.84	0.12	0.37	-0.74	-0.36	0.48	0.01	0.29	0.36	-0.06	-0.07	-0.66	-0.6	1.27	0.42
VENM980101	Statistical potential derived by the maximization of the perceptron criterion		Vendruscolo, M. and Domany E.	Pairwise contact potentials are unsuitable for protein folding	J. Chem. Phys. 109, 11101-11108 (1998)	-0.02808	0.01438	0.0543	0.09084	-0.0321	-0.07726	0.01673	-0.1196	0.07582	0.08769	0.00069	0.1005	0.00943	0.01585	-0.18164	0.02297	-0.1314	0.04386	-0.08755	0.03575	0.0197	0.09398	-0.1873	-0.0072	-0.00952	0.02004	-0.0372	0.0865	0.00253	0.0711	-0.03475	-0.06461	-0.01841	0.02	0.086	-0.1748	0.00916	-0.0218	-0.00094	-0.0338	-0.03699	0.0522	-0.1188	0.0876
ZHAC000101	Environment-dependent residue contact energies (rows = helix, cols = helix)	PMID:10706611	Zhang, C. and Kim, S.H.	Environment-dependent residue contact energies for proteins	Proc. Natl. Acad. Sci. USA 97, 2550-2555 (2000)	-1.65	0.02	1.08	-0.25	0.25	0.14	-0.06	-0.16	0.09	0.53	-2.04	-0.54	-0.95	-1.04	-2.81	0	0.41	0.2	0.15	-0.41	0.59	0.29	-0.11	0.52	1.32	-0.38	0.47	1.24	-1.74	-0.11	-0.62	-0.67	-2.35	-0.01	0.37	-1.68	-0.48	0.34	0.1	-0.09	-1.21	0.43	-0.09	-0.42
ZHAC000104	Environment-dependent residue contact energies (rows = strand, cols = strand)	PMID:10706611	Zhang, C. and Kim, S.H.	Environment-dependent residue contact energies for proteins	Proc. Natl. Acad. Sci. USA 97, 2550-2555 (2000)	-2.52	-1.24	0.03	-1.22	-0.8	-0.48	-1.22	-1.51	-1.17	-0.07	-3.4	-0.78	-1.72	-1.34	-3.74	-1.17	-0.68	-0.74	-0.71	-1.97	-0.1	-0.77	-1.24	-0.67	-0.18	-0.83	-0.47	0.72	-2.84	-1.25	-1.69	-1.64	-3.17	-1.6	-1.07	-2.6	-1.69	-0.94	-0.67	-1.44	-2.31	-1.04	-1.17	-2.08
ZHAC000106	Environment-dependent residue contact energies (rows = coil, cols = coil)	PMID:10706611	Zhang, C. and Kim, S.H.	Environment-dependent residue contact energies for proteins	Proc. Natl. Acad. Sci. USA 97, 2550-2555 (2000)	0.12	0.56	1.18	0.59	0.83	0.83	0.65	0.33	0.61	1.15	-0.74	-0.25	-0.07	-0.12	-2.42	0.7	0.94	0.87	0.96	-0.05	1.22	1.32	0.54	1.09	1.48	0.2	1.11	2.18	0.11	0.65	0.79	0.75	-0.56	0.73	1.16	0.35	0.35	0.47	0.91	0.29	-0.83	0.83	0.74	0.53
[truncated: 166 more columns]
